# Supplementary material for: A chitosan/poly(ethylene glycol)-ran-poly(propylene glycol) blend as an eco-benign separator and binder for quasi-solid-state supercapacitor applications
Source: Royal Society of Chemistry journal article supplement (doi:10.1039/c8se00530c), 2019-01-01
Supplement: c8se00530c1.pdf [file c8se00530c1.pdf]

### Supporting information

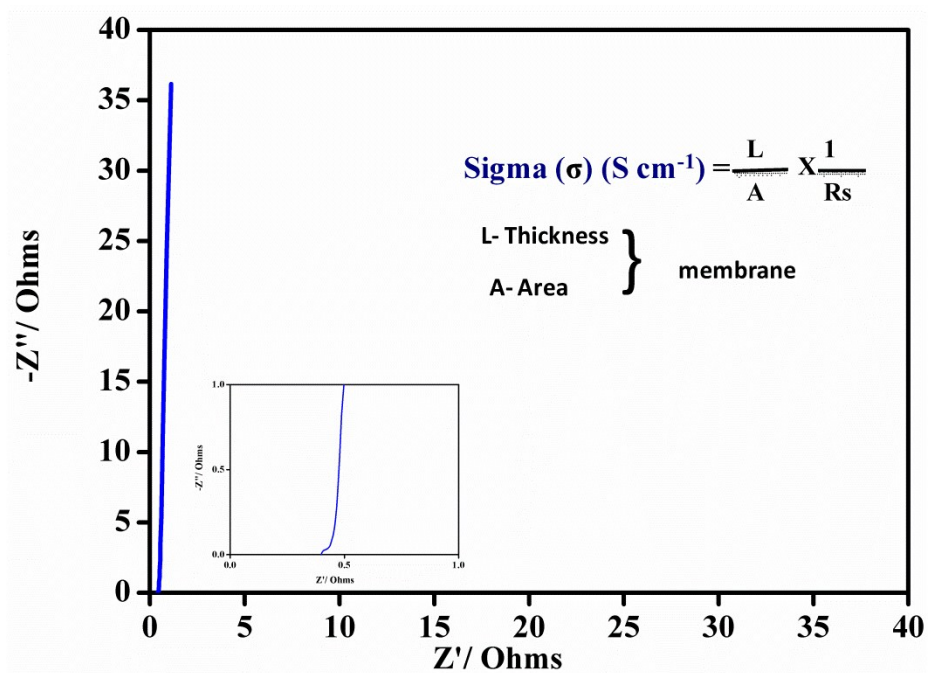

**Fig. S1.** Nyquist plot for ionic conductivity measurement of TGPH/ H<sub>2</sub>SO<sub>4</sub>-(1M)-soaked-Ch/poly(EG-ran-PG) membrane/TGPH cell

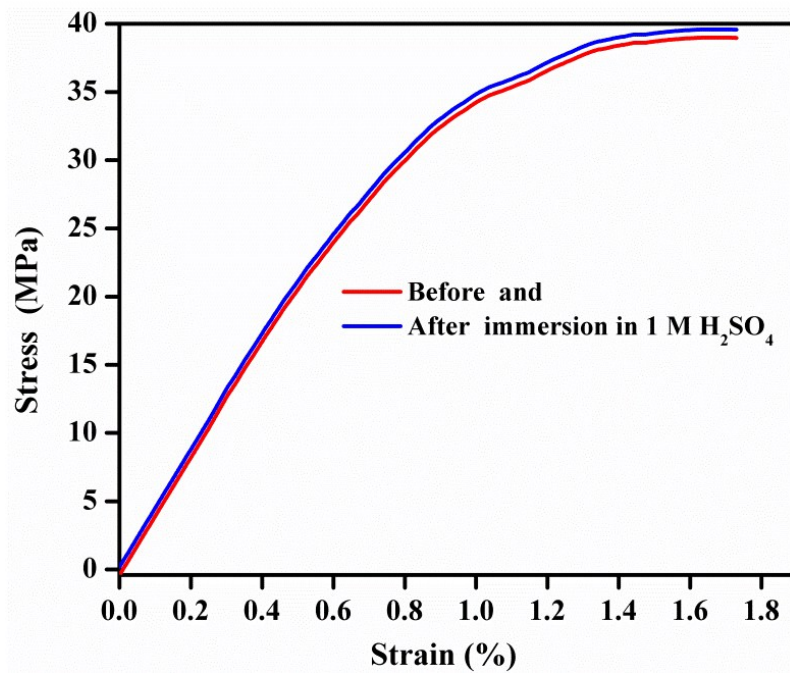

**Fig. S2.** Tensile strength measurement of Ch/poly(EG-ran-PG) blend membrane before and after soaking in 1 M H<sub>2</sub>SO<sub>4</sub>
